# Supplementary material
Source: PubMed Central journal article supplement (PMC5583466)
Supplement: CVI.00099-17_zcd999095509s1.pdf [file CVI.00099-17_zcd999095509s1.pdf]

Supplemental Table 1. Sequence type and phenotype of parental strains.

| <b>Strain</b> | <b><i>hsdS allele</i><sup>(1,2)</sup></b> | <b>Transparent vs opaque</b> | <b>Sequence type<sup>(3)</sup></b> | <b>PubMLST id</b> |
|---------------|-------------------------------------------|------------------------------|------------------------------------|-------------------|
| 0556-97       | B                                         | Mixed                        | ST199                              | 38163             |
| 3031-06       | B                                         | Mixed                        | ST199                              | 38164             |

Supplemental Table 2. Primers used in this study

| Primer (direction) | Location       | Sequence                                | Purpose (fragment)                                                                                                      | Source     |
|--------------------|----------------|-----------------------------------------|-------------------------------------------------------------------------------------------------------------------------|------------|
| 5482 (F)           | <i>rpsL</i>    | CTGGAATTCACCAAAAATAAAA<br>AAACACAGGAG   | Transformation into 0556-97 and<br>3031-06                                                                              | (4)        |
| 3482 (R)           | <i>rpsL</i>    | CTAGGGCCCCTTTCCTTATGCTT<br>TTGGAC       | Transformation into 0556-97 and<br>3031-06                                                                              | (4)        |
| 5168 (F)           | <i>wzx</i>     | TTGGTCTGATTATGCACCTC                    | Creation of <i>wciZ</i> variant constructs<br>(BLS143, 157, 171); Sequencing<br><i>wciZ</i> region of clinical isolates | This study |
| 3162 (R)           | <i>wciZ/JS</i> | CAAACCTTCTAGACTGCATATTA<br>CCTTCTCTCC   | Creation of <i>wciZ</i> deletion construct<br>(BLS143); Sequencing <i>wciZ</i> region<br>of clinical isolates           | This study |
| 5169 (F)           | <i>wciZ/JS</i> | GTAATATGCAGTCTAGAAGTTT<br>GATTTTTAATGG  | Creation of <i>wciZ</i> deletion construct<br>(BLS143)                                                                  | This study |
| 3163 (R)           | <i>JS/wchX</i> | GATTTAATCGCGCCCCTTTCCTT<br>ATGCTTTTG    | Creation of <i>wciZ</i> deletion construct<br>(BLS143)                                                                  | This study |
| 5170 (F)           | <i>JS/wchX</i> | CATAAGGAAAGGGGCGCGATTA<br>AATCACCTAAAGC | Creation of <i>wciZ</i> deletion construct<br>(BLS143); Sequencing <i>wciZ</i> region<br>of clinical isolates           | This study |
| 3164 (R)           | <i>wchX</i>    | CCCATCATCTCTGAAAGTAG                    | Creation of <i>wciZ</i> variant constructs<br>(BLS143, 157, 171); Sequencing<br><i>wciZ</i> region of clinical isolates | This study |
| 3229 (R)           | <i>wciZ</i>    | CTGCATATTACCTTCTCTCC                    | BLS171 <i>wciZ</i> construct, 5' fragment                                                                               | This study |
| 5256 (F)           | <i>wciZ</i>    | GGAGAGAAGGTAATATGCAG                    | BLS171 <i>wciZ</i> construct, 3' fragment                                                                               | This study |
| 5508 (F)           | <i>dexB</i>    | GCCGTAGTCTATCAAGTCTATC<br>CAA           | <i>cps</i> locus deletion construct<br>(BLS147)                                                                         | This study |
| 3493 (R)           | <i>aliA</i>    | TGCTTCCAAGGATTGTTTCATAG<br>ATTG         | <i>cps</i> locus deletion construct<br>(BLS147)                                                                         | This study |

Supplemental Table 3. *cps* loci differences between a clinical isolate 0556-97 (serotype 15B) used in this study and a reference serotype 15B strain (7904/39 strain) in literature (5)

| Nucleotide <sup>a</sup> | 7904/39 <sup>b</sup>        | BLS141 <sup>c</sup> | Gene                     | Function                          | Amino Acid difference <sup>d</sup> |
|-------------------------|-----------------------------|---------------------|--------------------------|-----------------------------------|------------------------------------|
| 293-1203                | <i>aliB</i> , IS1630<br>tnp | IS1202 tnp          |                          |                                   |                                    |
| 1204-3382               |                             | >90 snps            | <i>wzg-wzh</i>           | regulatory region                 |                                    |
| 5743                    | A                           | C                   | <i>wchA</i>              | initiating<br>glycosyltransferase | Arg318Arg                          |
| 5772                    | G                           | A                   | <i>wchA</i>              | initiating<br>glycosyltransferase | <b>Gln327Gln</b>                   |
| 7296                    | G                           | A                   | <i>wzy</i>               | polymerase                        | <b>Met64Ile</b>                    |
| 7352                    | G                           | T                   | <i>wzy</i>               | polymerase                        | <b>Leu83Phe</b>                    |
| 10200                   | A                           | G                   | <i>wchM</i>              | $\beta$ -galactosyltransferase    | Val298Val                          |
| 10841                   | T                           | C                   | <i>wchN</i>              | $\alpha$ -galactosyltransferase   | <b>Val188Ala</b>                   |
| 12344                   | A                           | G                   | <i>wzx</i>               | flippase                          | <b>Ile385Val</b>                   |
| 12947                   | G                           | A                   | intergenic               | N/A <sup>e</sup>                  | N/A                                |
| 14387                   | C                           | A                   | <i>wchX</i>              | glycerol<br>phosphotransferase    | <b>Gln130Lys</b>                   |
| 16712                   | T                           | C                   | <i>gtp2</i>              | CDP-2-glycerol<br>synthesis       | <b>Val162Ala</b>                   |
| 17156                   | A                           | T                   | <i>gtp3</i>              | CDP-2-glycerol<br>synthesis       | Val70Val                           |
| 17393                   | C                           | T                   | <i>gtp3</i>              | CDP-2-glycerol<br>synthesis       | Arg149Arg                          |
| 17869-18375             |                             | 9 snps              | IS1381 and<br>IS1671 tnp |                                   |                                    |

<sup>a</sup> Nucleotide number is with respect to the reference sequence (GenBank Accession No. CR931664.1)

<sup>b</sup> Accession no. CR931664.1

<sup>c</sup> Accession no. KY750633

<sup>d</sup> Amino acid sequence differences are with respect to 7904/39. Boldface indicates a missense substitution.

<sup>e</sup> N/A means not applicable.

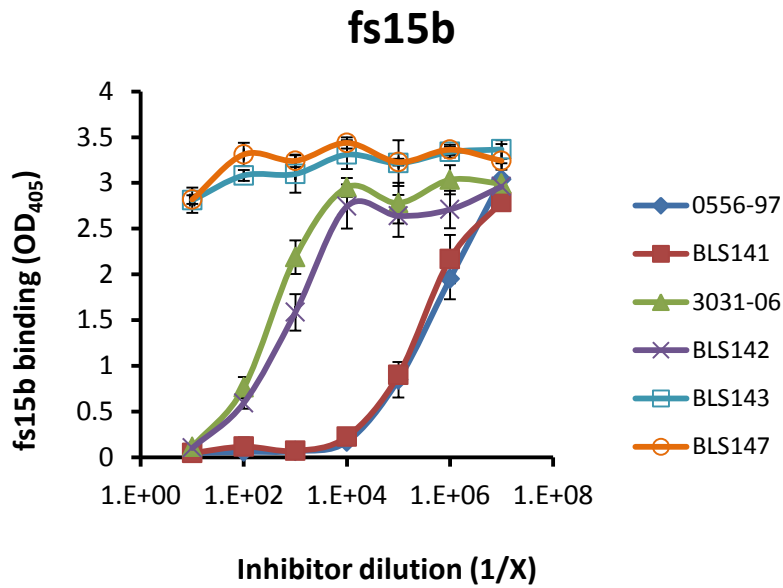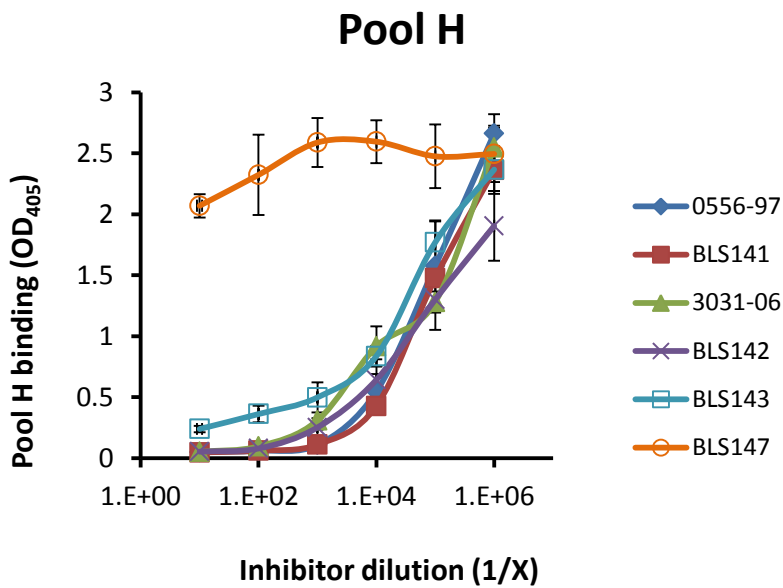

Supplemental Figure 1. Parental clinical isolates (0556-97 and 3031-06) and the transformed reference strains (BLS141 and BLS142, respectively) have equivalent amounts of O-acetylation and capsule based on fs15b and Pool H binding, respectively. Error bars indicate standard deviation of the three intra-assay replicates.

## REFERENCES

1. **Manso AS, Chai MH, Atack JM, Furi L, De Ste Croix M, Haigh R, Trappetti C, Ogunniyi AD, Shewell LK, Boitano M, Clark TA, Korlach J, Blades M, Mirkes E, Gorban AN, Paton JC, Jennings MP, Oggioni MR.** 2014. A random six-phase switch regulates pneumococcal virulence via global epigenetic changes. *Nature Communications* **5**:5055.
2. **Li J, Li JW, Feng Z, Wang J, An H, Liu Y, Wang Y, Wang K, Zhang X, Miao Z, Liang W, Sebra R, Wang G, Wang WC, Zhang JR.** 2016. Epigenetic Switch Driven by DNA Inversions Dictates Phase Variation in *Streptococcus pneumoniae*. *PLoS Pathog* **12**:e1005762.
3. **Enright MC, Spratt BG.** 1998. A multilocus sequence typing scheme for *Streptococcus pneumoniae*: identification of clones associated with serious invasive disease. *Microbiology* **144 ( Pt 11)**:3049-3060.
4. **Calix JJ, Oliver MB, Sherwood LK, Beall BW, Hollingshead SK, Nahm MH.** 2011. *Streptococcus pneumoniae* serotype 9A isolates contain diverse mutations to *wcjE* that result in variable expression of serotype 9V-specific epitope. *Journal of Infectious Diseases* **204**:1585-1595.
5. **Bentley SD, Aanensen DM, Mavroidi A, Saunders D, Rabinowitsch E, Collins M, Donohoe K, Harris D, Murphy L, Quail MA, Samuel G, Skovsted IC, Kalltoft MS, Barrell B, Reeves PR, Parkhill J, Spratt BG.** 2006. Genetic analysis of the capsular biosynthetic locus from all 90 pneumococcal serotypes. *PLoS Genet* **2**:e31.
